# Supplementary material for: Fabrication of solar and electrically adjustable large area smart windows for indoor light and heat modulation
Source: Royal Society of Chemistry journal article supplement (doi:10.1039/c7tc01489a), 2017-01-01
Supplement: c7tc01489a1.pdf [file c7tc01489a1.pdf]

## Supporting information

### **Fabrication of solar and electrically adjustable large area smart windows for indoor light and heat modulations**

Ashutosh K. Singh,<sup>a,#</sup> S. Kiruthika,<sup>b,#</sup> Indrajit Mondal<sup>a</sup>, and Giridhar U. Kulkarni<sup>\*,a,⊥</sup>

<sup>a</sup> Centre for Nano and Soft Matter Sciences, Jalahalli, Bangalore 560013, India.

<sup>b</sup> Chemistry & Physics of Materials Unit and Thematic Unit of Excellence in Nanochemistry, Jawaharlal Nehru Centre for Advanced Scientific Research, Jakkur P.O., Bangalore 560064, India.

\* E-mail: [guk@cens.res.in](mailto:guk@cens.res.in)

# A. K. Singh, S. Kiruthika contributed equally to this work.

⊥ On lien from JNCASR, Bangalore, India.

---

\*To whom correspondence should be addressed:

Centre for Nano and Soft Matter Sciences, Jalahalli, Bangalore 560013, India.

\* E-mail: [guk@cens.res.in](mailto:guk@cens.res.in)

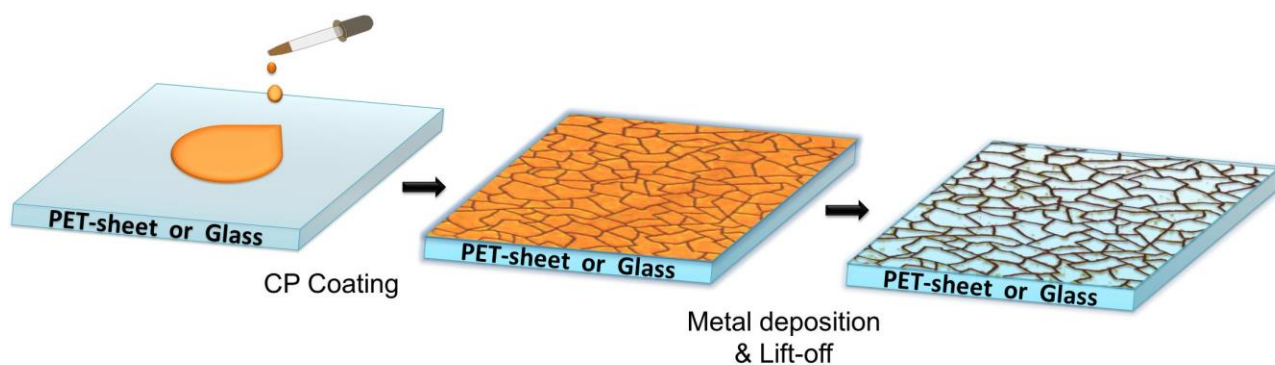

**Fig.S1** Schematic illustration for the fabrication of metal mesh network.

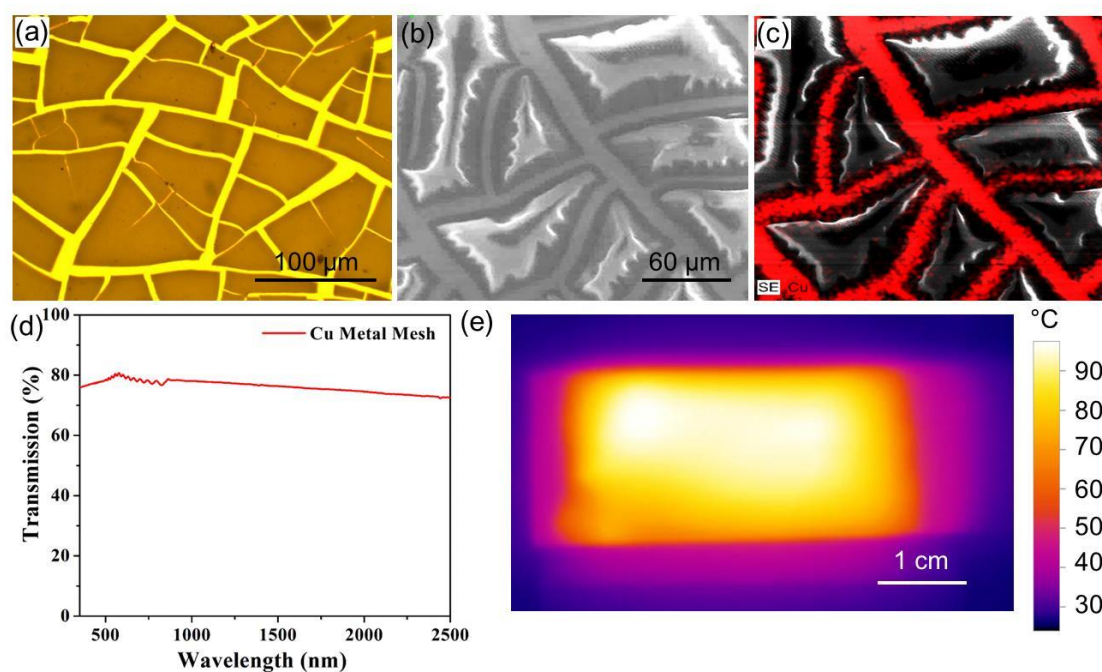

**Fig.S2** (a) Optical microscopy and (b) SEM images of Cu mesh on PET substrate. (c) EDS mapping of Cu clearly indicates that Cu is present only in the network structure with no residues in between. (d) Transmittance spectrum and (e) IR image of the Cu mesh.

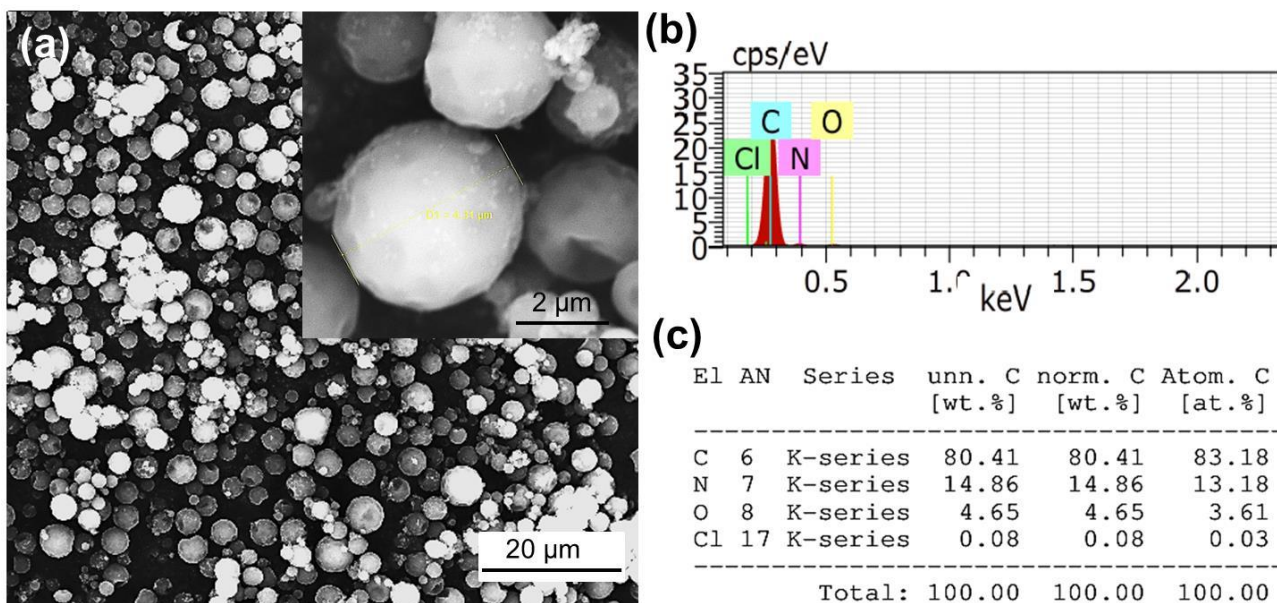

**Fig.S3** (a) SEM image (b) EDS spectrum and (c) atomic composition of thermochromic pigment.

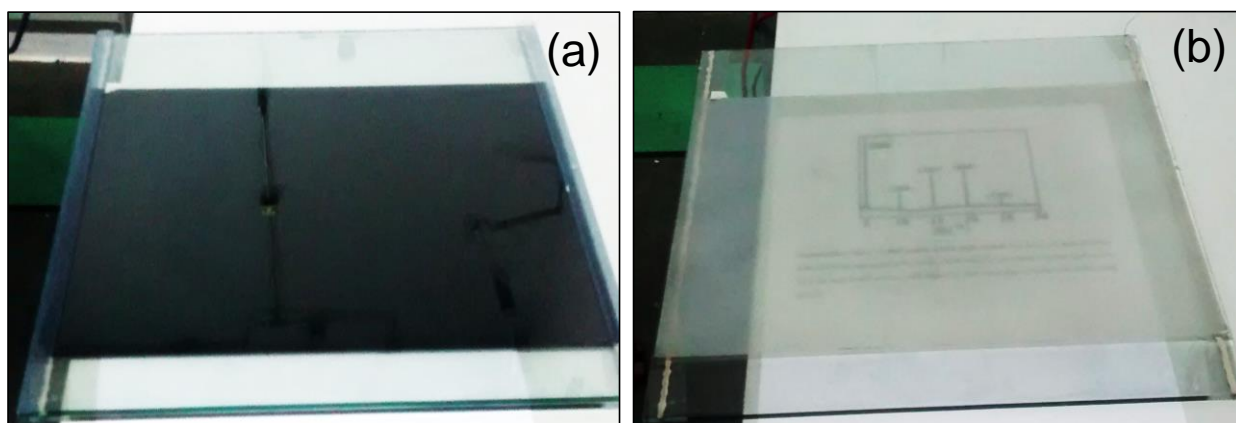

**Fig.S4** Photographs of A4 size thermochromic device fabricated with Cu mesh in its  $V_{\text{OFF}}$  (a) and  $V_{\text{ON}}$  states (b).

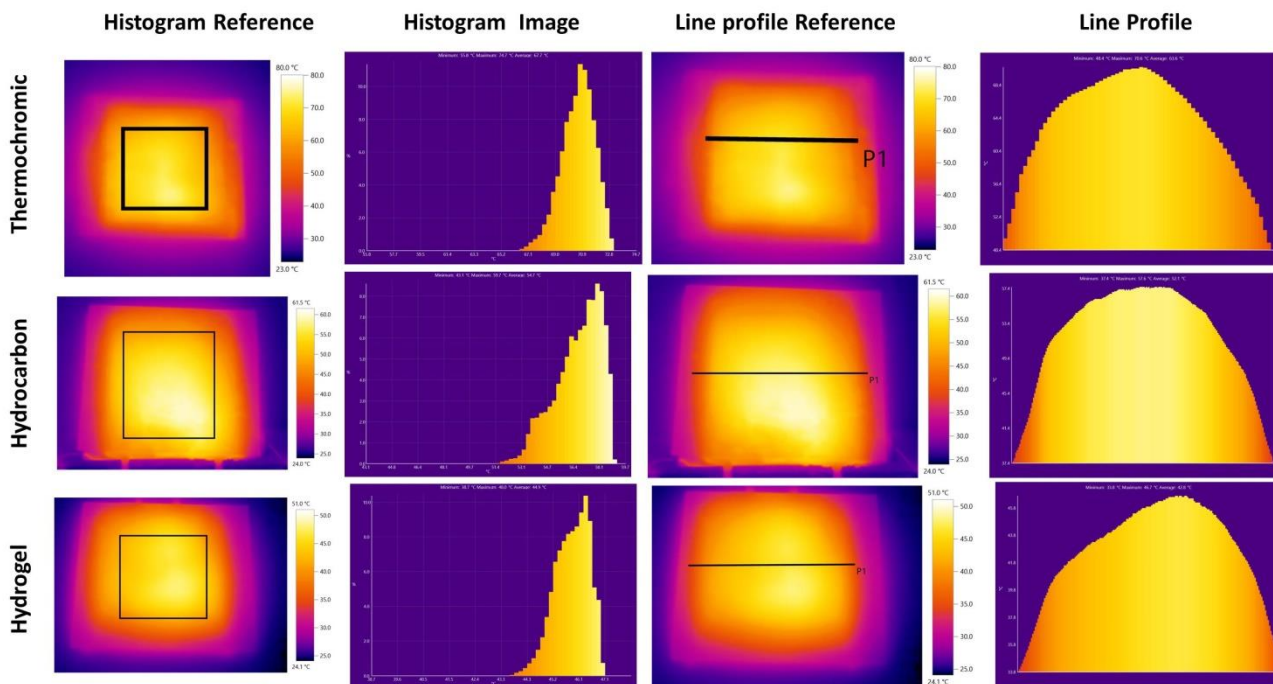

**Fig.S5** IR images with its histogram and line profile for thermochromic, hydrocarbon and hydrogel devices.

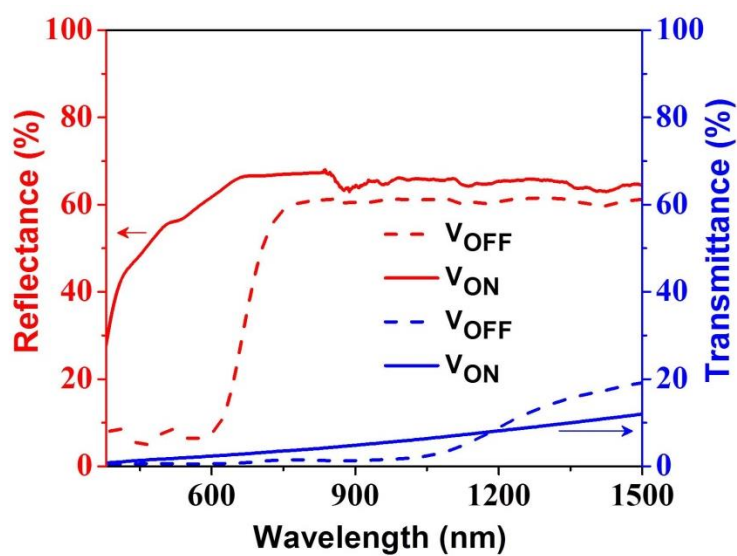

**Fig.S6** Reflectance and transmittance of thermochromic device in NIR region.

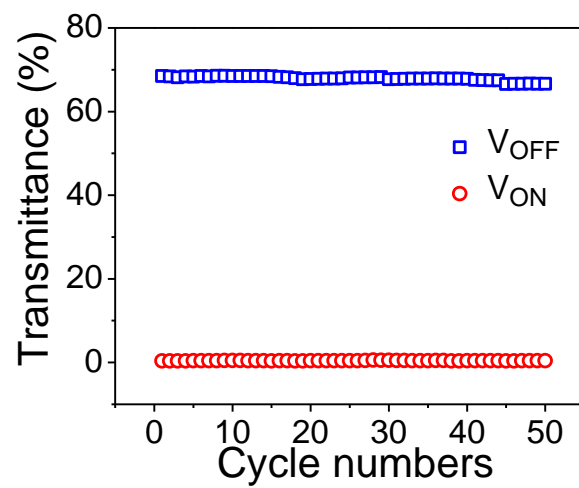

**Fig. S7** Cycle stability of a hydrogel device.
